# Supplementary material
Source: PubMed Central journal article supplement (PMC4457687)
Supplement: NIHMS668206-supplement-supplement_1.pdf [file NIHMS668206-supplement-supplement_1.pdf]

### **Table and Figure Titles and Captions:**

Table 1: Cycle Characteristics Per Transfer

Supplemental Table 1: Multivariate Generalized Estimating Equation Analysis of Transferred Blastocyst to Live Birth Efficiency

$\beta$  values indicate the estimated coefficient of each independent factor as associated with embryo to live birth efficiency, after adjusting for the other variables in the model. Positive  $\beta$  values indicate a positive correlation with embryo to live birth efficiency.

Figure 1: Pregnancy Outcomes Single vs. Double Frozen Blastocyst Transfer (FBT)\*

Figure 2: Incidence and Severity of Prematurity, Single vs. Double Frozen Blastocyst Transfer (FBT)

Mean gestational age at birth was 38w5d  $\pm$  13d in the single embryo group vs. 37w5d  $\pm$  21d with double transfer ( $p < 0.0001$ ). The difference was attributable to increased twin delivery in the double embryo transfer group.

**Supplemental Table 1:**

| <b>Variable</b>                          | <b><math>\beta</math> (95% Confidence Interval)</b> | <b>P-value</b> |
|------------------------------------------|-----------------------------------------------------|----------------|
| Blastocysts Transferred (1 vs 2)         | 4.56 (0.33, 8.79)                                   | 0.034          |
| Patient Age at Vitrification             | -1.25 (-3.78, 1.28)                                 | 0.33           |
| Patient Age at Warming/Transfer          | -0.08 (-2.61, 2.44)                                 | 0.95           |
| Body Mass Index (BMI)                    | -0.55 (-0.93, -0.16)                                | 0.005          |
| Uterine Factor (yes vs no)               | -4.91 (-16.03, 6.22)                                | 0.39           |
| PCOS (yes vs no)                         | 1.22 (-4.41, 6.84)                                  | 0.67           |
| Prior Parity                             | -4.16 (-7.65, -0.66)                                | 0.020          |
| Prior Transfers w/o Birth                | -1.65 (-3.45, 0.16)                                 | 0.074          |
| Live Birth in Fresh Transfer (yes vs no) | 9.12 (0.78, 17.47)                                  | 0.032          |
| Vitrify-All (yes vs no)                  | 1.27 (-7.87, 10.41)                                 | 0.78           |
| PGD/PGS (yes vs no)                      | -1.81 (-11.85, 8.23)                                | 0.72           |
| Number of Vitrified Embryos              | 0.07 (-0.85, 1.00)                                  | 0.88           |
| Mean Day of Vitrification                | -11.70 (-17.03, -6.38)                              | <0.0001        |
| Embryo Survival (%)                      | 0.09 (-0.05, 0.24)                                  | 0.21           |
| Intact Cells (%)                         | 1.21 (0.80, 1.63)                                   | <0.0001        |
